1 **Signatures of positive selection and local adaptation to urbanization in white-footed mice**

2 ***(Peromyscus leucopus)***

3

4 Stephen E. Harris (S.E.H)<sup>1\*</sup> and Jason Munshi-South (J.M.-S.)<sup>2</sup>

5

6 <sup>1</sup>The Graduate Center, City University of New York (CUNY), New York, NY 10016 USA

7

8 <sup>2</sup>Louis Calder Center—Biological Field Station, Fordham University, 31 Whipoorwill Road

9 Armonk, NY 10504 USA

10

11 *\*Corresponding author:* Stephen E. Harris

12 E-mail: [harris.stephen.e@gmail.com](mailto:harris.stephen.e@gmail.com)

13 Current address: Department of Biology, Purchase College, State University of New York

14 (SUNY), Purchase, NY 10577 USA

15

16 *Running title:* Local adaptation in urban white-footed mice

17

18 **ABSTRACT**

19 Urbanization significantly alters natural ecosystems and has accelerated globally. Urban wildlife  
20 populations are often highly fragmented by human infrastructure, and isolated populations may  
21 adapt in response to local urban pressures. However, relatively few studies have identified  
22 genomic signatures of adaptation in urban animals. We used a landscape genomics approach to  
23 examine signatures of selection in urban populations of white-footed mice (*Peromyscus*  
24 *leucopus*) in New York City. We analyzed 154,770 SNPs identified from transcriptome data  
25 from 48 *P. leucopus* individuals from three urban and three rural populations, and used outlier  
26 tests to identify evidence of urban adaptation. We accounted for demography by simulating a  
27 neutral SNP dataset under an inferred demographic history as a null model for outlier analysis.  
28 We also tested whether candidate genes were associated with environmental variables related to  
29 urbanization. In total, we detected 381 outlier loci and after stringent filtering, identified and  
30 annotated 19 candidate loci. Many of the candidate genes were involved in metabolic processes,  
31 and have well-established roles in metabolizing lipids and carbohydrates. Our results indicate  
32 that white-footed mice in NYC are adapting at the biomolecular level to local selective pressures  
33 in urban habitats. Annotation of outlier loci suggest selection is acting on metabolic pathways in  
34 urban populations, likely related to novel diets in cities that differ from diets in less disturbed  
35 areas.

36

37 *Keywords:* transcriptome, *Peromyscus leucopus*, genotype-environment association, urban  
38 evolutionary biology, genome scans, positive selection, landscape genomics, urbanization

## 39 INTRODUCTION

40 Urban habitats are one of the fastest growing and most rapidly changing environments  
41 around the world. While urbanization has been traditionally viewed as a driver of declining  
42 habitat quality in and around cities, there is growing interest in the idea that urban areas represent  
43 novel environments with unique selective pressures (Donihue & Lambert 2015). The recently  
44 developed but burgeoning field of urban evolutionary biology aims to determine how  
45 urbanization leads to evolutionary change through mutation, genetic drift, gene flow, and natural  
46 selection in urban populations.

47 The ecological changes that occur within cities are likely to have many evolutionary  
48 implications. Human infrastructure causes habitat loss and fragmentation and changes resource  
49 availability, novel species interactions occur because human movements and commerce  
50 introduce a diverse array of nonnative species, and human activity increases exposure to  
51 chemical, light, and noise pollution (McKinney 2002; Chace & Walsh 2004; Shochat *et al.* 2006;  
52 Sih *et al.* 2011). These changes lead to unique pressures in novel urban habitats that may rapidly  
53 drive evolutionary change over short timescales. Increased genetic drift in relatively isolated  
54 urban populations, genetic differentiation between populations with restricted gene flow from  
55 urban infrastructure, or allele frequency shifts due to local urban adaptation, are all likely  
56 outcomes of evolution in cities (Munshi-South 2012; Merilä & Hendry 2014; Donihue &  
57 Lambert 2015).

58 Urban populations are potentially excellent systems for examining how species respond  
59 to anthropogenic environmental change, what genes and traits are involved, and how quickly  
60 populations locally adapt to changing environments. Local adaptation is a common phenomenon  
61 in nature (Stinchcombe & Hoekstra 2008; Bonin 2008; Linnen *et al.* 2009; Hohenlohe *et al.*

62 2010a; Turner *et al.* 2010; Ellison *et al.* 2011; De Wit & Palumbi 2013), and often results from  
63 the operation of selection on standing genetic variation as opposed to novel mutations over  
64 relatively short time scales (Barrett & Schluter 2008; Stapley *et al.* 2010). Additionally, the  
65 quantitative traits involved in local adaptation may involve many genes of small effect working  
66 to produce the desired phenotype (Orr 2005; Rockman 2012), and these ecologically relevant but  
67 non-conspicuous phenotypes are predicted to be those most involved in urban adaptation (Sih *et*  
68 *al.* 2011). However, traits with relatively simple genetic architecture may also be under selection  
69 in urban environments (Thompson *et al.* 2016). Investigating the genetic basis of local  
70 adaptation has provided insight into a variety of evolutionary processes including speciation,  
71 maintenance of genetic diversity, range expansion, and species responses to changing  
72 environments (Savolainen *et al.* 2013; Tiffin & Ross-Ibarra 2014), and holds great promise for  
73 understanding adaptive evolution in response to urbanization.

74         Landscape genomics has recently produced a number of approaches for studying local  
75 adaptation. This field is defined by the spatially explicit study of genomic variation (Sork *et al.*  
76 2013) that seeks to identify environmental variables influencing adaptive genomic variation  
77 (Rellstab *et al.* 2015). Landscape genomics, and more specifically genotype-by-environment  
78 analyses (GEA), can successfully identify associations between urban environmental variables  
79 and allele frequencies that indicate adaptation to local urban conditions. These approaches can  
80 also help to untangle the interactions between neutral demographic processes and selection  
81 (Rellstab *et al.* 2017). Urban populations are influenced by both genetic drift through founder  
82 effects and barriers to gene flow, and selection acting on genetic variation linked to increased  
83 fitness in urban settings.

84           A small but growing number of studies have documented how populations may locally  
85 adapt to urban selective pressures through changes in allele frequencies and / or undergo  
86 directional shifts in phenotypic traits. Yeh (2004) reported that sexually-selected tail coloration  
87 in Juncos (*Junco hyemalis*) was rapidly evolving in urban populations compared to rural ones.  
88 European Blackbirds (*Turdus merula*) exhibit evidence of selection on genes underlying anxiety  
89 behavior in newly established populations across multiple cities (Partecke *et al.* 2006; Mueller *et*  
90 *al.* 2013). Cheptou *et al.* (2008) reported that a weed (*Crepis sancta*) in urban vegetation plots  
91 surrounded by paved surfaces showed heritable changes in seed morphology and dispersal.  
92 Reduced snow cover in urban areas leads to colder minimum ground temperatures and  
93 Thompson *et al.* (2016) found parallel adaptive evolution in urban white clover (*Trifolium*  
94 *repens*) populations that had increased freezing tolerance. Several studies have also found likely  
95 adaptive genetic and morphological changes in urban mammal populations. Suggestive of urban  
96 adaptation, a specific mitochondrial genotype rose to fixation in white-footed mice (*Peromyscus*  
97 *leucopus*) populations in Chicago along with morphological changes to skull shape after  
98 urbanization (Pergams & Lacy 2008). In urban areas of Italy, Kuhl's pipistrelle (*Pipistrellus*  
99 *kuhlii*) bat populations had significantly larger bodies and longer skulls than natural populations,  
100 suggesting urban adaption to a novel diet introduced when artificial illumination attracted an  
101 increased number of large hard-bodied moths (Tomassini *et al.* 2014).

102           Few studies in urban evolutionary biology have been able to measure phenotypic  
103 changes, definitively link them to genetic changes, and establish fitness benefits to demonstrate  
104 evolutionary adaptation. One exception are urban killifish (*Fundulus heteroclitus*), where  
105 selective pressure from polychlorinated biphenyls (PCBs) has led to the evolution of PCB  
106 tolerance in urban populations (Whitehead *et al.* 2010; Reid *et al.* 2016). Adaptation to PCB

107 pollution was also reported in tomcod (*Microgadus tomcod*) in the Hudson River through a  
108 deletion that similarly increases tolerance to PCBs (Wirgin *et al.* 2011). Urban adaptation has  
109 also been confirmed in the well-known peppered moth (*Biston betularia*) system. Recent  
110 evidence suggests that the industrial melanism trait in this species is linked to an insertion of a  
111 transposable element in the *cortex* gene in the early 1800s that spread throughout the population  
112 in response to industrial airborne pollution (Hof *et al.* 2016). The study of additional systems  
113 will likely identify a complex array of adaptive evolutionary responses in cities (Whitehead *et al.*  
114 2017).

115         Here we examined signatures of selection in isolated urban populations of white-footed  
116 mice, *Peromyscus leucopus*, in New York City (NYC) using a landscape genomics approach.  
117 *Peromyscus* spp. (Rodentia, Cricetidae) are a group of abundant small mammals found across  
118 much of North and Central America. They live in a diverse array of habitats that exposes them  
119 to a variety of selective pressures, and thus multiple *Peromyscus* spp. have become model  
120 systems for studies examining ecology, evolution, and physiology in natural populations  
121 (Munshi-South & Richardson 2017). There is also evidence that *Peromyscus* spp. readily adapt  
122 to environmental change (Storz *et al.* 2007, 2009, 2010; Mullen & Hoekstra 2008; Linnen *et al.*  
123 2009; Weber *et al.* 2013; Natarajan *et al.* 2013; Munshi-South & Richardson 2017), making  
124 them good subjects for the study of local adaptation. White-footed mice are one of the few native  
125 mammals that thrive in extremely small, fragmented urban forests in North America (Pergams &  
126 Lacy 2008; Rogic *et al.* 2013; Munshi-South & Nagy 2014), and tend to be found at higher  
127 densities in urban vs. rural patches due to a thick understory providing abundant food resources  
128 and exclusion of major predators and competitors (Rytwinski & Fahrig 2007). Increased density  
129 may also be due to limited *P. leucopus* dispersal between urban sites. Munshi-South (2012)

130 found barriers to dispersal between isolated NYC parks, with migrants only moving through  
131 significantly vegetated corridors throughout the city. There is also substantial genetic structure  
132 between NYC parks as measured by microsatellites (Munshi-South & Kharchenko 2010),  
133 genome-wide SNPs (Munshi-South *et al.* 2016) and demographic modeling (Harris *et al.* 2016).  
134 We have also previously identified signatures of selection in urban populations of NYC white-  
135 footed mice (Harris *et al.* 2013), though we used smaller datasets and more limited approaches  
136 than presented here.

137         In the current study, we examined SNPs generated from individual transcriptome  
138 sequencing for *P. leucopus* from three urban sites in NYC and three rural sites from the  
139 surrounding area. We generated a large SNP dataset and produced estimates of nucleotide  
140 diversity ( $\pi$ , Tajima 1983), Tajima's  $D$  (Tajima 1989), and  $F_{ST}$  (Wright 1951) to generate per-site  
141 estimates and identify loci that deviate from neutral expectations. We then used a variety of  
142 genome scan methods and outlier tests to identify genes subject to selection in an urban setting.  
143 Our approach identified population differentiation, shifts in allele frequencies, and associations  
144 between alleles and environmental variables. However, neutral demographic processes such as  
145 population bottlenecks can produce signatures of genetic variation similar to those produced by  
146 selection (Oleksyk *et al.* 2010; Li *et al.* 2012). We accounted for this possibility by  
147 incorporating a simulated neutral SNP dataset from an inferred demographic history (Harris *et al.*  
148 2016) directly into our null model for identifying outliers (Excoffier *et al.* 2009; Gutenkunst *et*  
149 *al.* 2009; Li *et al.* 2012; Vitti *et al.* 2013; Lotterhos & Whitlock 2015).

150         The three specific aims of this study were the following: 1. identify candidate genes  
151 exhibiting signatures of selection in NYC populations of white-footed mice using a variety of  
152 genome scan methods and outlier tests; 2. distinguish genetic outliers resulting from selection

153 rather than demography by incorporating demographic histories of white-footed mice in NYC  
154 into null models of genome scans; and 3. identify genes that are statistically associated with  
155 environmental variables representative of urbanization using landscape genomic approaches.

156

## 157 **MATERIALS AND METHODS**

### 158 **Sampling, library preparation, and transcriptome assembly**

159 We trapped and collected white-footed mice from 2010 - 2012. For full details on  
160 sampling, transcriptome sequencing, assembly and SNP calling, see Harris *et al.* 2013, 2015. In  
161 brief, we randomly chose eight adult white-footed mice (equal numbers of males and females)  
162 from each of six sampling locations (N = 48 total) representative of urban and rural habitats and  
163 with minimal within-site genetic structure (Fig. 1) (Harris *et al.* 2013, 2015). Three sampling  
164 sites were within NYC parks: Central Park in Manhattan (CP), New York Botanical Gardens in  
165 the Bronx (NYBG), and Flushing Meadows—Willow Lake in Queens (FM). These sites  
166 represented urban habitats surrounded by high levels of impervious surface cover and high  
167 human population density, as previously quantified in Munshi-South *et al.* (2016). The  
168 remaining three sites occurred ~100 km outside of NYC in rural, undisturbed habitat  
169 representative of natural environments for *P. leucopus*. High Point State Park is in the Kittatinny  
170 Mountains in New Jersey (HIP), Clarence Fahnestock State Park is located in the Hudson  
171 Highlands in New York (CFP), and Brookhaven and Wildwood State Parks occur on the  
172 northeastern end of Long Island, New York (BHWWP). Total RNA was extracted separately  
173 from livers stored in RNA later for each of the 48 mice, treated with DNase, enriched through  
174 ribosomal RNA depletion, fragmented, reverse transcribed, amplified and tagged with a unique  
175 barcode, and sequenced in four lanes of one SOLiD 5500XL run (Harris *et al.* 2015). We called



176 SNPs with the Genome Analysis Toolkit (GATK version 2.8) pipeline using a Bayesian  
177 genotype likelihood model (DePristo *et al.* 2011). In order to call a SNP, we required it to occur  
178 in at least five individuals, have a nucleotide quality (q-score)  $\geq 30$ , exhibit no strand bias (FS  $\geq$   
179 35), and to come from only uniquely mapped reads. We also required SNPs to have an overall  
180 depth  $\geq 10X$  and  $\leq 350X$  (to account for paralogous sequences), a minor allele frequency (MAF)  
181  $\geq 0.025$ , and removed SNPs where every individual was heterozygous.

182

### 183 **Summary statistics**

184 SNP information was stored in a VCF (variant call format) file and summary statistics  
185 were calculated using vcftools 0.1.12b (Danecek *et al.* 2011). We calculated per-site nucleotide  
186 diversity ( $\pi$ ), Tajima's  $D$ , and  $F_{ST}$ . We also calculated the statistics for each contig (per-site  
187 statistic summed across all SNPs per contig divided by total sites) and calculated the average  
188 estimate for each population, including all pairwise population comparisons for  $F_{ST}$ .

189

### 190 **Scans for positive selection based on population differentiation**

191 We used the  $F_{ST}$  based analysis implemented in BayeScan v. 2.1 (Foll & Gaggiotti 2008)  
192 to compare all six population-specific allele frequencies with global averages and identify outlier  
193 SNPs. BayeScan identifies loci that exhibit divergence between groups that is stronger than  
194 would be expected under neutral genetic processes. Based on a set of neutral allele frequencies  
195 under a Dirichlet distribution, BayeScan uses a Bayesian model to estimate the probability that a  
196 given locus has been subject to selection. To generate more realistic allele frequency  
197 distributions, we used BayeScan for independent coalescent simulations of SNP datasets based  
198 on a neutral demographic history inferred by Harris *et al.* (2016) specifically for each  $P$ .

199 *leucopus* population. Using the coalescent-based fastsimcoal2 software (Excoffier *et al.* 2013),  
200 we generated 100 sets of 100,000 SNPs each for every population in this study from a three  
201 population isolation-with-migration model using parameter estimates for divergence time,  
202 effective population size, migration rate, and population size change previously inferred in Harris  
203 *et al.* (2016). In short, the model represented a deep split between an ancestral population into  
204 Long Island, NY and the mainland (including Manhattan) 29,440 generations before present  
205 (GBP). A third population (representing the sampling sites in this study) later became isolated  
206 746 GBP. Urban populations were also modeled to include a population size change event at the  
207 time of divergence. BayeScan was run independently on each of the 100 simulated datasets from  
208 fastsimcoal2 using default parameters to generate a null distribution of BayeScan statistics.

209 BayeScan was then run on the observed SNP dataset using default parameters. We  
210 performed several different analyses including a global analysis, one with two populations  
211 representing urban and rural groups, and finally analyses on all sampling site pairwise  
212 comparisons. We retained outlier SNPs with a q-value  $\leq 0.1$  (leading to a FDR of  $\leq 0.1$ ) and  
213 with a posterior odds probability from BayeScan higher than for any value calculated from the  
214 simulated dataset. BayeScan also calculates alpha ( $\alpha$ ), a locus specific  $F_{st}$  coefficient, where a  
215 positive value suggests diversifying selection and a negative value suggests balancing or  
216 purifying selection. There were no SNPs with negative  $\alpha$  values.

217 For comparison to BayeScan results, we used a related method, BayPass (Gautier 2015),  
218 that identifies loci subject to selection based on allele frequency patterns that deviate from  
219 neutral expectations. We ran BayPass using default parameters under the auxiliary covariate  
220 (AUX) model, and simulated pseudo-observed datasets (PODs) under the Inference Model in  
221 Baypass as suggested by Gautier (2015) to calibrate neutral distributions for XtX. BayPass uses

222 the XtX statistic to identify adaptive divergence. SNPs with XtX estimates greater than the 95%  
223 threshold determined from PODs were identified as resulting from adaptive divergence.

224

### 225 **Analysis for selective sweeps**

226 We also identified outlier regions when the observed SFS showed an excess of low  
227 frequency and high frequency minor alleles, a signal indicative of a recent selective sweep. The  
228 composite likelihood ratio (CLR) statistic is used to identify regions where the observed SFS  
229 matches the expected SFS generated from a selective sweep (Kim & Stephan 2002; Nielsen *et al.*  
230 2005; Pavlidis *et al.* 2010). We calculated the CLR along sliding windows across the  
231 transcriptome using the software program SweeD (Pavlidis *et al.* 2013). SweeD is an extension  
232 of Sweepfinder (Nielsen *et al.* 2005) that is optimized for large next generation sequencing  
233 (NGS) datasets. We lacked a genome to provide high-quality linkage information so SweeD was  
234 run separately for each population and on individual contigs. We used default parameters except  
235 for using a sliding window size of 200 bp and use of a folded SFS, as we lacked an outgroup to  
236 infer ancestral alleles. The window within each contig with the highest CLR score is considered  
237 the likely location of a selective sweep. Similar to the method used for BayeScan, statistical  
238 significance was established from a null distribution generated by running SweeD on SNP  
239 datasets simulated under the inferred demographic history for *P. leucopus* populations (Harris *et*  
240 *al.* 2016). SweeD does not inherently identify outlier regions. The CLR is computed using a  
241 selective sweep model on the observed data and then compared to a neutral model calibrated  
242 with a simulated background SFS. As before, we used 100 datasets with 100,000 SNPs each,  
243 simulated under the inferred neutral demographic history for white-footed mice in NYC. The  
244 CLR was calculated using SweeD for all simulated datasets. We identified outlier contigs if their

245 CLR value was greater than any produced in neutral simulations. We also required outliers to  
246 fall within the top 0.01% of the CLR distribution for the observed SNPs.

247

## 248 **Genotype-environment association tests for environmental selection**

249 We used the GEA approach of LFMM: Latent Factor Mixed Models (Frichot *et al.* 2013)  
250 to associate our full SNP dataset with potential environmental selection pressures. LFMM  
251 examines associations between environmental and genetic variation while accounting for the  
252 neutral genetic background and structure between populations (Frichot *et al.* 2013). We tested  
253 three environmental variables associated with urbanization: 1) percent impervious surface (i.e.  
254 surfaces such as roads, rooftops, and other human infrastructure that do not absorb water  
255 calculated from USGS National Land Cover Data) within a 2 km (the approximate lifetime  
256 dispersal distance of white-footed mice) buffer around each sampling site's GPS coordinate, 2)  
257 human density within a two-kilometer buffer around each sampling site's GPS coordinate  
258 (calculated from US Census blocks), and 3) categorization of each site as urban, within NYC  
259 limits, or rural, undeveloped state park outside city limits (Coded as 0 or 1 in LFMM).  
260 Calculations were made in ArcGIS v10.1 (ESRI, Redlands, CA, USA) and were previously  
261 reported in Munshi-South *et al.* (2016). This previous analysis found that variables 1-2 were  
262 significantly associated with genome-wide variation in *P. leucopus* populations in the NYC  
263 metropolitan area. LFMM requires the user to define the number of latent factors,  $K$ , that  
264 describe population structure in the dataset. To identify the appropriate number of  $K$  latent  
265 factors, we performed a genetic PCA followed by a Tracy-Widom test to find the number of  
266 eigenvalues with  $P$  values  $\leq 0.01$  (Patterson *et al.* 2006; Frichot & François 2015). Based on this  
267 approach, we ran LFMM with default parameters except for  $K = 6$ , number of MCMC cycles =

268 100,000, and burn-in = 50,000. Using author recommendations, we calculated the median  $|z|$ -  
269 score from 10 replicate runs and then readjusted the p values. LFMM uses  $|z|$ - scores to report  
270 the probability of a SNP's association with an environmental variable. Again, we controlled for  
271 FDR by using a q-value threshold of  $\leq 0.1$ .

272 BayPass also includes an environmental analysis, so for comparison to LFMM we used  
273 the GEA test implemented in the BayPass AUX model that identifies genetic markers associated  
274 with population-specific covariates (Gautier 2015). For population covariates, we used the same  
275 environmental variables used in LFMM: site classification (i.e. urban or rural) as a binary  
276 covariate, human density, and impervious surface. We used the AUX model and again simulated  
277 pseudo-observed datasets (PODs) under the Inference Model to calibrate neutral distributions for  
278 Bayes Factors (BFs). BayPass uses BFs to associate SNPs with population specific covariates.  
279 SNPs with BF estimates greater than the 95% threshold determined from PODs were considered  
280 to be associated with population covariates. We further filtered associations by setting a cutoff  
281 for  $BF \geq 20$ .

282

### 283 **Functional annotation of candidate genes**

284 We used the gene annotation pipeline in Blast2GO (Conesa *et al.* 2005; Götz *et al.* 2008)  
285 to identify sequences from the NCBI non-redundant protein database that were homologous to  
286 our outlier contigs identified above. We then retrieved associated gene ontology (GO) terms.  
287 Blast2GO retrieves GO terms associated with BLASTX hits and uses the KEGG database to  
288 describe biochemical pathways linking different enzymes (Ogata *et al.* 1999; Kanehisa *et al.*  
289 2014). For downstream enrichment analyses, we also used the Ensembl gene annotation system  
290 (Aken *et al.* 2016) to find homologous *Mus musculus* genes for each *P. leucopus* contig. We

291 further interpreted the outlier gene lists using g:Profiler (Reimand *et al.* 2016) to identify gene  
292 ontology terms enriched in our outlier gene list compared to the fully annotated *Mus musculus*  
293 genome. We used the g:Profiler webserver and identified enriched terms associated with outlier  
294 genes using default parameters and the Benjamini–Hochberg correction for multiple comparisons  
295 with an adjusted p-value < 0.05. Finally, we used REViGO to cluster GO terms and summarize  
296 them in a subset of terms based on semantic similarity measures (Supek *et al.* 2011).

297

## 298 **RESULTS**

### 299 **Genetic diversity statistics**

300 **In total**, we identified 154,770 SNPs for investigating patterns of genetic variation and  
301 performing tests of selection. Urban populations had a 50% decrease in nucleotide diversity  
302 compared to the rural populations, but mean Tajima’s *D* values for rural parks were consistently  
303 higher than for urban parks (Table 1). The average nucleotide diversity for all three rural  
304 populations was  $0.224 \pm 0.034$  SE, while the average for urban populations was only  $0.112 \pm$   
305  $0.019$  SE. The average Tajima’s *D* within populations did not show substantial differences  
306 between populations (Table 1). For all populations, Tajima’s *D* was slightly positive. Average  
307 pairwise  $F_{ST}$  were the lowest between rural populations ( $0.018 \pm 0.364$  SE, CFP – HIP Table S1)  
308 and highest between urban populations ( $0.110 \pm 0.520$  SE, CP – FM Table S1). These  $F_{ST}$   
309 values were similar to  $F_{ST}$  estimated using genome-wide SNP datasets (Munshi-South *et al.*  
310 2016).

311

### 312 **Outlier detection and environmental associations**

313 We used BayeScan to identify 39 outlier SNPs exhibiting patterns of divergent selection  
314 between urban and rural populations (Fig. 2A, Table S2). There were no SNPs that exhibited  
315 signatures of balancing selection.  $F_{ST}$  values for outlier SNPs ranged from 0.21 - 0.33.  
316 BayeScan identified zero outlier SNPs in the simulated neutral dataset, and accordingly the 39  
317 outlier SNPs from the observed data had q-values that were smaller than the most extreme values  
318 for the simulated data (q-value  $\leq 0.6$ ). We ran a similar test looking for patterns of divergence  
319 using BayPass. This analysis identified 56 SNPs that showed evidence of divergent selection  
320 (Table S2). We used PODs to estimate a null distribution and outlier SNPs had XtX values  $\geq$   
321 8.35 (top 5% of the null distribution). There were 11 SNPs associated with diversifying  
322 selection in both the BayeScan and BayPass analyses.

323 To identify signatures of selective sweeps, we used the CLR statistic implemented in  
324 SweeD. We found that CLR scores in the top 5% of the simulated distribution were generally 2-  
325 3X lower than values in the top 5% of the observed dataset. We ran SweeD on observed SNPs  
326 within individual contigs and identified outliers by filtering for a CLR score  $\geq 3.53$  (the  
327 maximum CLR from simulated data). We also chose regions that fell within the top 0.01% of  
328 the observed distribution (Fig. 2B); all outliers had CLR scores  $\geq 4.97$ . SweeD identified regions  
329 with SFS patterns that fit a selective sweep model in 45 contigs within urban populations (Table  
330 S2). There was no overlap between outlier SNPs identified by SweeD and BayeScan / BayPass.

331 There were 131 SNPs associated with at least one of three environmental variables tested  
332 using LFMM (Fig. 3A, Table S2). There was zero overlap with outliers identified from  
333 BayeScan and only one SNP that overlapped between SweeD and LFMM. Three SNPs  
334 identified in BayPass as outliers showing signatures of diversifying selection were also  
335 associated with environmental covariates in LFMM (Table S2). All three SNPs were within

336 genes associated with human density around sampling sites and one was associated with all three  
337 environmental covariates. In an analysis similar to LFMM, we used BayPass to also associate  
338 environmental variables, called population covariates, with allele frequencies. There were 143  
339 SNPs associated with at least one of the three environmental covariates tested using BayPass  
340 (Table S2). From these 143, five overlapped with those showing signatures of divergent selection  
341 in BayPass and eleven overlapped with outliers in BayeScan.

342         Across all tests, SNPs identified as outliers or associated with environmental variables  
343 were found in 381 contigs. We filtered this list down to a subset of 19 contigs (Table 2) that are  
344 the most likely candidates for directional selection due to urban selective pressures. We required  
345 these filtered candidate contigs to show a signature of diversifying selection between urban and  
346 rural populations (BayScan or BayPass) or a signature of a selective sweep (SweeD), and they  
347 had to be associated with an environmental variable (human density around parks, impervious  
348 surface) as identified in GEA tests (LFMM or BayPass).

349

### 350 **Functional annotation**

351         The full contig sequences containing outlier SNPs were obtained from the *P. leucopus*  
352 transcriptome (Harris *et al.* 2015) and used for functional annotation and analysis. We first tested  
353 the full set of 381 contigs identified by all outlier tests for overrepresented GO terms using  
354 g:Profiler. There were 260 overrepresented GO terms from the full outlier list (Table S3). We  
355 summarized this list using REViGO into 23 representative terms. The top representative term  
356 was lipid metabolism, followed by organic substance catabolism (Table S4). The list also  
357 includes lipid homeostasis and immune system processes.



358 We also looked for overrepresentation in the gene annotations associated with the filtered  
359 subset of 19 outliers and found related results (Table 3). There were 15 contigs homologous to  
360 known genes with functional annotation. Metabolic pathways were the most overrepresented  
361 group of gene ontology terms, and there were two biological functions associated with the most  
362 overrepresented GO terms from the full list. These included non-alcoholic fatty liver disease and  
363 regulation of protein kinase b (AKT) signaling.

364

## 365 **DISCUSSION**

366 In this study, we investigated patterns of divergent positive selection between urban and  
367 rural populations of *P. leucopus*, and identified significant associations between outlier SNPs and  
368 environmental variables relevant to urbanization. The majority of candidate loci were annotated  
369 with GO terms that are significantly associated with dietary metabolism, particularly breakdown  
370 of lipids and carbohydrates. We discuss what these findings mean for organisms inhabiting  
371 novel urban ecosystems, and more generally for understanding the ecological processes and time  
372 frame of local adaptation in changing environments.

373 Our previous study investigated non-synonymous polymorphisms in pooled  
374 transcriptome samples and we reported evidence for positive selection in genes dealing with  
375 metabolism, immunity, and methylation in NYC white-footed mice (Harris *et al.* 2013). This  
376 current study supports the phenotypic traits likely under selection in urban environments,  
377 identifying outlier genes that play major roles in metabolism, and to a lesser extent, immunity,  
378 but few outlier genes were identified in both the current and previous studies. The dataset  
379 analyzed here was much larger, included more sampling sites, and changed the inclusion criteria  
380 for outlier genes by using analyses that identify more recent signatures of selection, as opposed

381 to longer-term evolutionary changes in non-synonymous substitutions . However, it is important  
382 to note that our study is still relatively small, including only six populations and eight individuals  
383 from each population. Increasing the number of individuals and sampling sites, especially  
384 including multiple cities as replicates, would likely greatly improve the associations found  
385 between environmental variables and allele frequencies (Lotterhos & Whitlock 2015). The latter  
386 approach may be unlikely, however, with each urban setting presenting a unique set of selective  
387 pressures leading to local adaptive responses, as shown with coat coloration in beach mice  
388 (*Peromyscus polionotus*) (Hoekstra *et al.* 2006) and climate related adaptation in the flowering  
389 plant (*Arabidopsis halleri*) (Rellstab *et al.* 2017). Despite potential issues with sample size, we  
390 did find two of the eleven previously identified candidate genes (Harris *et al.* 2013) to be direct  
391 matches to outliers in this current analysis (Serine protease inhibitor a3c and Solute carrier  
392 organic anion transporter 1A5), and two other genes were from the same gene families or  
393 involved in the same biological processes. One gene, an aldo-keto-reductase protein, is part of  
394 the same gene family as the aflatoxin reductase gene (Contig 10636-348) identified in this study.  
395 The aldo-keto reductase gene family comprises a large group of essential enzymes for  
396 metabolizing natural and foreign substances (Hyndman *et al.* 2003). The other is a cytochrome  
397 P450 (CYPA1A) gene involved in metabolism of drugs and lipids. *Peromyscus* directly express  
398 CYPA1A and Hsp90 (outlier from current SweeD analysis) when exposed to environmental  
399 toxins (Settachan 2001).

400

#### 401 **Population genomics summary statistics**

402 Before performing outlier tests, we initially calculated per-site nucleotide diversity and  
403 Tajima's D. The Tajima's D statistic was calculated per contig for each population. We found

404 nucleotide diversity to be lower in all urban population compared to rural populations,  
405 supporting previous work that found a negative association between genome-wide SNP diversity  
406 and urbanization. That study included the six populations studied here and an additional 18  
407 populations distributed along an urban-to-rural gradient (Munshi-South *et al.* 2016). While loss  
408 of genetic variation will reduce evolutionary potential and decrease the probability of local  
409 adaptation, selection may still act if adequate variation is present and genetic drift is not too  
410 strong (Donihue & Lambert 2015; Munshi-South *et al.* 2016). Tajima's D is often used to  
411 identify signatures of selection, comparing observed to expected heterozygosity. For all our  
412 populations, Tajima's D skewed positive, possibly explained by balancing selection. While  
413 balancing selection has been found to maintain variation in immune loci in fragmented urban  
414 population of bobcats (*Lynx rufus*) (Serieys *et al.* 2015), it is difficult to distinguish whether  
415 demography or selection drives Tajima's D values in many cases (MacManes & Eisen 2014).  
416 We have estimated the complex demographic history for *P. leucopus* populations in NYC (Harris  
417 *et al.* 2016), suggesting Tajima's D may not be the best tool for identifying selection in this  
418 system. Outlier tests are more robust to demography and we explicitly accounted for the specific  
419 demographic history of *P. leucopus* in the null models used during analysis of our genome scan  
420 methods.

421

## 422 **Signatures of selection in urban populations from genome-wide scans**

423 Over the past decade, genome scans have become feasible methods to detect and  
424 disentangle neutral and adaptive evolutionary processes for non-model organisms (De  
425 Villemereuil *et al.* 2014; Hoban *et al.* 2016). One method, BayeScan (Foll & Gaggiotti 2008),  
426 calculates the posterior probability that a site is under the influence of selection by testing

427 models with and without selection. While BayeScan is relatively robust to confounding  
428 demographic processes (Pérez-Figueroa *et al.* 2010; De Villemereuil *et al.* 2014), population  
429 bottlenecks, hierarchical structure, recent migration, or variable times to most-recent-common-  
430 ancestor (MRCA) between populations can artificially inflate  $F_{ST}$  values (Hermisson 2009;  
431 Lotterhos & Whitlock 2014) and may still impact BayeScan (Savolainen *et al.* 2013; Lotterhos &  
432 Whitlock 2014). We minimized false positives by incorporating population structure and a  
433 specific demographic history for *P. leucopus* in NYC directly into the null distribution of  $F_{ST}$   
434 (Harris *et al.* 2016). We only included outliers if their posterior probability was greater than  
435 probabilities calculated from these simulations. The outliers from BayeScan comprised 0.024%  
436 of the total number of loci analyzed from our RNASeq dataset, and 0.036% of the total loci using  
437 BayPass. These percentages are in line with candidates uncovered from a similar study (0.05%)  
438 that looked at high and low altitude populations of the plant *Senecio chrysanthemifolius*  
439 (Chapman *et al.* 2013). Many studies find higher percentages of outlier loci using BayeScan; for  
440 example, 4.5% in the American pika across its range in British Columbia (Henry & Russello  
441 2013), and 5.7% in Atlantic herring across their range (Limborg *et al.* 2012). Our lower overall  
442 percentage of outliers may be due to differences in species or datasets between studies (false  
443 positive rate, power, sampling, genome size and composition are all variables that influence  
444 numbers of SNPs), or alternatively because of relatively recent isolation or moderate to weak  
445 selection in urban populations.

446 SweeD, another genome scan approach, examines patterns within a population's SFS  
447 rather than allelic differentiation between populations. The main footprint that selective sweeps  
448 leave on the SFS is an excess of low- and high-frequency variants (Nielsen 2005). The  
449 SweepFinder method (Nielsen *et al.* 2005), recently upgraded to the NGS compatible SweeD

450 (Pavlidis *et al.* 2013), uses a CLR test based on the ratio between the likelihood of a neutral and  
451 selective sweep hypothesis. As above, the weakness of hitchhiking methods is the confounding  
452 influence certain demographic processes have on the SFS (Hermisson 2009). However, building  
453 a robustly inferred demographic history into the null model substantially reduces false positive  
454 rates (Pavlidis *et al.* 2013). We included the *P. leucopus* demographic history into our analysis,  
455 and found 0.019% of the sequenced loci to contain SFS patterns indicative of selective sweeps.  
456 This rate is in line with other studies that reported that 0.5% of regions in domesticated rice  
457 (Wang *et al.* 2014), 0.02% of loci in black cottonwood (Zhou *et al.* 2014), and 0.02% of the  
458 gorilla genome (McManus *et al.* 2014) show evidence of selective sweeps or hitchhiking.

459         Several studies have shown that identifying outliers with multiple tests and diverse  
460 theoretical approaches is the best way to reduce false positives in genome outlier analyses  
461 (Nielsen 2005; Grossman *et al.* 2010; Hohenlohe *et al.* 2010b). We required candidate genes to  
462 show a signature of diversifying selection or a signature of a selective sweep, and they had to be  
463 associated with an environmental variable. We found several outliers identified in both  
464 BayeScan and BayPass (Table S2), however, there was no overlap between BayeScan / BayPass  
465 and SweeD outliers. This discrepancy is likely due to the different selection scenarios  
466 underlying each test, i.e. divergent local selection versus population-wide positive selection in  
467 the form of selective sweeps (Hermisson 2009).  $F_{ST}$  based methods respond to allelic divergence  
468 relatively quickly, while models for selective sweeps typically require nearly-fixed derived  
469 alleles (Hohenlohe *et al.* 2010b). Given the recent history of urbanization in NYC, many  
470 selective sweeps may be ongoing or otherwise incomplete. Selection may also be acting on  
471 standing genetic variation in the form of soft sweeps (Hermisson & Pennings 2005) that are not  
472 readily identified by SweeD.

473

474 **Environmental associations strengthen evidence of local adaptation to urbanization**

475 GEA tests are a growing class of methods that identify loci that are associated with  
476 environmental factors (Joost *et al.* 2007; Coop *et al.* 2010; Frichot *et al.* 2013), and by  
477 accounting for underlying correlation structure of allele frequencies, may often be more powerful  
478 than traditional outlier tests (Savolainen *et al.* 2013). GEA tests come from the field of landscape  
479 genomics which incorporates tools from landscape genetics and population genomics to examine  
480 the effects of demography, migration, and selection, and ultimately identify local adaptation  
481 (Sork *et al.* 2013; Rellstab *et al.* 2015). Here we used LFMM (Frichot *et al.* 2013) and the AUX  
482 covariate model from BayPass on the full SNP dataset with environmental metrics of  
483 urbanization. LFMM performs better than other methods in the presence of hierarchical  
484 structure and when polygenic selection is acting on many loci with small effect (De Villemereuil  
485 *et al.* 2014). Hierarchical structure in our dataset includes urban and rural differentiation (Harris  
486 *et al.* 2015; Harris *et al.* 2016), patterns of geographic structure between mainland mice and  
487 Long Island, NY (Harris *et al.* 2016), and population structure between individual urban parks  
488 (Munshi-South & Kharchenko 2010). Simulations also suggest that LFMM is superior when  
489 sample size is less than 10 individuals per population, there is no pattern of IBD, and the study  
490 compares environmentally divergent habitats (Lotterhos & Whitlock 2015). We sampled eight  
491 white-footed mice per population, found no evidence of IBD (Munshi-South *et al.* 2016), and  
492 sampled environmentally divergent rural and urban locations.

493 Using GEA tests implemented in BayPass and LFMM, we found that 17 (12 %) and 4  
494 (2.8 %) outliers, respectively, were significantly associated with one or more urbanization  
495 variables. These results are lower than other studies combining genome scans and GEA tests.

496 Limborg *et al.* (2012) found 62.5% of the outliers identified in BayeScan were correlated with  
497 temperature or salinity in Atlantic herring, and 26.3% of genome scan outliers were associated  
498 with temperature or latitude in a tree species (De Kort *et al.* 2014). The lower overlap found in  
499 our study is likely due to the difficult nature in quantifying urbanization. Percent impervious  
500 surface, human population density, or binary classification as urban versus rural may not capture  
501 the specific, causative selection pressures acting on white-footed mouse populations (See Table  
502 S5 for environmental data). We used these metrics as general proxies for changing ecological  
503 processes in urbanized habitats. The percent of impervious surface around a park is likely  
504 representative of habitat fragmentation, as urban infrastructure changes the net primary  
505 productivity due to increasing percentages of impervious surface or artificial landscapes, parks  
506 and yards (Shochat *et al.* 2006). This fragmentation then leads to changing species interactions  
507 as migration is impeded or organisms are forced into smaller areas (Shochat *et al.* 2006). The  
508 percent human density surrounding an urban park can serve as a proxy for the multitude of  
509 ecological changes humans impose on their surrounding environment. Urbanization and  
510 increasing human density change the types and availability of resources in the altered habitat  
511 (McKinney 2002; Sih *et al.* 2011). Finally, classifying our sites as urban or rural can generally  
512 capture the main differences in urban and natural sites. For example, pollution is a major  
513 consequence of urbanization (Donihue & Lambert 2015), and urban areas often include  
514 increased chemical, noise, or light pollution (Sih *et al.* 2011).

515         Between divergent allele frequencies, a skewed SFS, environmental associations, and  
516 overrepresented GO terms, we find several overlapping lines of evidence that support rapid  
517 divergent selection in white-footed mice. Our results support the growing body of evidence  
518 (Donihue & Lambert 2015) that finds urbanization directly impacts the ecology and evolution of

519 species. However, to fully support the hypothesis that organisms adapt to urban habitats, it is still  
520 necessary to link genetic changes to measurable phenotypic differences and measure direct  
521 fitness benefits. Past urban evolutionary studies often focus solely on phenotypic (Yeh 2004;  
522 Partecke *et al.* 2006; Cheptou *et al.* 2008; Thompson *et al.* 2016) or genetic (Wandeler *et al.*  
523 2003; Noël & Lapointe 2010; Mueller *et al.* 2013; Lourenco *et al.* 2017) differences between  
524 populations in and outside of cities. However, researchers are beginning to examine both the  
525 genotype and phenotype in parallel instances of urban evolution (Whitehead *et al.* 2010; Wirgin  
526 *et al.* 2011; Hof *et al.* 2016), which is key to understanding how urbanization affects the  
527 evolution of species. In the future, the gene annotations for our predicted outlier genes can help  
528 determine which phenotypic traits to measure in urban *P. leucopus* populations.

529

### 530 **Functional roles of candidate genes: quality of urban diet?**

531 The model rodents *Mus musculus*, *Rattus norvegicus*, and *Cricetulus griseus* all have  
532 deeply sequenced, assembled and annotated reference genomes. These resources allowed us to  
533 annotate 89.5% of outlier loci with high quality functional information. Urban *P. leucopus*  
534 exhibited signatures of positive selection in genes with GO terms overrepresented for organismal  
535 metabolic processes, specifically digestion and metabolism of lipids and carbohydrates.

536 Mitochondrial genes identified as outliers (Table S2) were largely responsible for the  
537 overrepresentation of metabolic process. While we can only speculate until further physiological  
538 studies are conducted, our evidence suggests that the evolution of mitochondrial and metabolic  
539 processes has been important to the success of *P. leucopus* living in NYC's urban forests.  
540 Mitochondrial genes have often been used to describe neutral population variation, but  
541 researchers have found ample evidence of selection acting on the mitochondrial genome



542 (Oliveira *et al.* 2008; Balloux 2010). For example, specific mitochondrial haplotypes are  
543 associated with more efficient thermogenesis and higher fitness in over-wintering shrews  
544 (Fontanillas *et al.* 2005). Pergams & Lacy (2007) found complete mitochondrial haplotype  
545 replacement in contemporary *P. leucopus* in Chicago compared to haplotypes sequenced from  
546 museum skins collected before urbanization. The agent of selection is not clear, but Munshi-  
547 South and Nagy (2014) also identified signatures of selection (or alternatively population  
548 expansion) in mitochondrial D-loop haplotypes from contemporary *P. leucopus* in NYC. Many  
549 mitochondrial functions are affected by the same environmental variables that change in  
550 response to urbanization, such as temperature (Balloux 2010), reduced migration (Lankau &  
551 Strauss 2011; Munshi-South 2012), or resource availability (Burcelin *et al.* 2002).

552       Urban *P. leucopus* may experience different energy budgets, physiological stressors or  
553 diets compared to rural counterparts. We found a substantial number of candidate genes with  
554 functions related to the metabolism and transport of lipids and carbohydrates, and the most  
555 common overrepresented GO terms involved lipid metabolism and homeostasis (Table S4). In  
556 the full outlier analysis, two genes are particularly interesting as targets of diet-mediated  
557 selection. The first gene, *FADSI*, is a fatty acid desaturase important for the biosynthesis of  
558 omega-3 and -6 fatty acids (long-chain polyunsaturated fatty acids, LCPUFA) from plant  
559 sources. Recent evidence suggests that the *FADS* gene family has been an important target of  
560 selection in humans during the transition from hunter-gather to agricultural societies (Ye *et al.*  
561 2017). Alleles linked to upregulated biosynthesis of LCPUFAs (naturally low in plant based  
562 diets) increased in frequency after the Neolithic Revolution (Ye *et al.* 2017). We aligned our  
563 homologous *FADSI* contig with human transcripts to identify whether *P. leucopus* had any  
564 relevant alleles, but our sequenced populations did not contain SNPs at any relevant loci. The

565 full list of outliers also contained *APOB-100*, which is the primary apolipoprotein that binds and  
566 transports lipids, including both forms of cholesterol (HDL and LDL).

567         When we investigated only candidate genes that were identified by both an outlier test  
568 and GEA test, we found similar patterns suggesting *P. leucopus* in urban environments may be  
569 adapting to novel food resources. These genes were strongly correlated with environmental  
570 measures of urbanization, with clearly divergent allele frequencies between urban and rural sites  
571 (Fig. 3B), suggesting that selection is acting on standing genetic variation in urban environments.  
572 The most significant overrepresented GO term involved regulation of protein kinase B (*AKT*).  
573 *AKT* is a key molecule in the insulin signaling pathway, important for promoting glucose storage  
574 and regulating glucose in the bloodstream between fed and fasting states (Boucher *et al.* 2014).  
575 Glycine metabolism was also overrepresented; increased amounts of glycine may be important  
576 for regulating high-fat, high-sugar diets by decreasing concentrations of free fatty acids and  
577 triglycerides (Wang *et al.* 2013). Finally, our candidate list contained genes significantly  
578 associated with non-alcoholic fatty liver disease (NAFLD). NAFLD is a major hallmark of  
579 obesity and diabetes and can be induced through increased uptake of dietary fatty acids (Fabbrini  
580 *et al.* 2010).

581         These candidate genes suggest that white-footed mice in isolated urban parks may be  
582 evolving in response to food resource differences between urban and rural habitats. This finding  
583 is corroborated by recent evidence that urban white-footed mice in NYC have shorter upper and  
584 lower tooth rows than rural mice (Yu *et al.* 2017). Lower quality food in the diet often requires  
585 increased chewing and is accompanied with larger occlusal surfaces, and subsequently, longer  
586 toothrows (Ungar 2010). One prediction is that urban *P. leucopus* consume a diet with a  
587 substantially higher fat content than diets of rural populations. The typical diet of *P. leucopus*

588 across its range consists of arthropods, fruits, nuts, various green vegetation, and fungus (Wolff  
589 *et al.* 1985). Given that white-footed mice are opportunistic generalists, many different food  
590 resources could differ between urban and rural habitats. Urbanization in NYC has produced  
591 relatively small green patches that are surrounded by a dense urban matrix, and *P. leucopus* in  
592 NYC may successfully take advantage of invasive plant species, different arthropod  
593 communities, or increased human food waste in and around their urban habitats. Local  
594 adaptation in urban populations may allow these mice to more efficiently metabolize different  
595 types or amounts of lipids and carbohydrates, although field studies are needed to examine the  
596 link between these genetic changes and diet in NYC.

597

## 598 **ACKNOWLEDGMENTS**

599 We thank Mike Hickerson for his helpful comments and advice on many analyses and for access  
600 to lab space for analyses and writing. We thank Diego Alvarado-Serrano, Alexander T. Xue,  
601 Tyler Joseph, and Champak Reddy for their invaluable comments and advice concerning  
602 bioinformatics and demographic analyses. Three anonymous reviewers and Prof. Stuart B.  
603 Piertney also provided very helpful comments on the manuscript through Axios Review, as did  
604 Dr. Aurélie Bonin and four anonymous reviewers for this journal. This research was supported  
605 by the National Institute of General Medical Sciences of the National Institutes of Health under  
606 award number R15GM099055 to JM-S and a NSF Graduate Research Fellowship to SEH. The  
607 content is solely the responsibility of the authors and does not represent the official views of the  
608 National Institutes of Health.

609

## 610 **REFERENCES**

611 Aken BL, Ayling S, Barrell D *et al.* (2016) The Ensembl gene annotation system. *Database*,

- 612       **2016**, baw093.
- 613   Balloux F (2010) The worm in the fruit of the mitochondrial DNA tree. *Heredity*, **104**, 419–420.
- 614   Barrett RDH, Schluter D (2008) Adaptation from standing genetic variation. *Trends in Ecology*  
615       *& Evolution*, **23**, 38–44.
- 616   Bonin A (2008) Population genomics: a new generation of genome scans to bridge the gap with  
617       functional genomics. *Molecular Ecology*, **17**, 3583–4.
- 618   Boucher J, Kleinridders A, Kahn CR (2014) Insulin Receptor Signaling in Normal and Insulin-  
619       Resistant States. *Cold Spring Harbor Perspectives in Biology*, **6**, a009191–a009191.
- 620   Burcelin R, Crivelli V, Dacosta A, Roy-Tirelli A, Thorens B (2002) Heterogeneous metabolic  
621       adaptation of C57BL/6J mice to high-fat diet. *American Journal of Physiology*.  
622       *Endocrinology and Metabolism*, **282**, E834–E842.
- 623   Chace JF, Walsh JJ (2004) Urban effects on native avifauna: a review. *Landscape and Urban*  
624       *Planning*, **74**, 46–69.
- 625   Chapman MA, Hiscock SJ, Filatov DA (2013) Genomic Divergence during Speciation Driven by  
626       Adaptation to Altitude. *Molecular Biology and Evolution*, **30**, 2553–67.
- 627   Cheptou P-O, Carrue O, Rouifed S, Cantarel A (2008) Rapid evolution of seed dispersal in an  
628       urban environment in the weed *Crepis sancta*. *Proceedings of the National Academy of*  
629       *Sciences of the United States of America*, **105**, 3796–9.
- 630   Conesa A, Götz S, García-Gómez JM *et al.* (2005) Blast2GO: a universal tool for annotation,  
631       visualization and analysis in functional genomics research. *Bioinformatics*, **21**, 3674–6.
- 632   Coop G, Witonsky D, Di Rienzo A, Pritchard JK (2010) Using environmental correlations to  
633       identify loci underlying local adaptation. *Genetics*, **185**, 1411–23.
- 634   Danecek P, Auton A, Abecasis G *et al.* (2011) The variant call format and VCFtools.

- 635 *Bioinformatics*, **27**, 2156–2158.
- 636 DePristo MA, Banks E, Poplin R *et al.* (2011) A framework for variation discovery and  
637 genotyping using next-generation DNA sequencing data. *Nature Genetics*, **43**, 491–8.
- 638 Donihue CM, Lambert MR (2015) Adaptive evolution in urban ecosystems. *AMBIO*, **44**, 194–  
639 203.
- 640 Ellison CE, Hall C, Kowbel D *et al.* (2011) Population genomics and local adaptation in wild  
641 isolates of a model microbial eukaryote. *Proceedings of the National Academy of Sciences*,  
642 **108**, 2831–2836.
- 643 Excoffier L, Dupanloup I, Huerta-Sanchez E, Sousa VC, Foll M (2013) Robust Demographic  
644 Inference from Genomic and SNP Data. *PLoS Genetics*, **9**, e1003905.
- 645 Excoffier L, Hofer T, Foll M (2009) Detecting loci under selection in a hierarchically structured  
646 population. *Heredity*, **103**, 285–98.
- 647 Fabbrini E, Sullivan S, Klein S (2010) Obesity and nonalcoholic fatty liver disease: Biochemical,  
648 metabolic, and clinical implications. *Hepatology*, **51**, 679–689.
- 649 Foll M, Gaggiotti O (2008) A genome-scan method to identify selected loci appropriate for both  
650 dominant and codominant markers: a Bayesian perspective. *Genetics*, **180**, 977–93.
- 651 Fontanillas P, Dépraz A, Giorgi MS, Perrin N (2005) Nonshivering thermogenesis capacity  
652 associated to mitochondrial DNA haplotypes and gender in the greater white-toothed shrew,  
653 *Crocidura russula*. *Molecular Ecology*, **14**, 661–670.
- 654 Frichot E, François O (2015) LEA : An R package for landscape and ecological association  
655 studies. *Methods in Ecology and Evolution*, **6**.
- 656 Frichot E, Schoville SD, Bouchard G, François O (2013) Testing for associations between loci  
657 and environmental gradients using latent factor mixed models. *Molecular Biology and*

- 658 *Evolution*, **30**, 1687–1699.
- 659 Gautier M (2015) Genome-wide scan for adaptive divergence and association with population-  
660 specific covariates. *Genetics*, **201**, 1555–1579.
- 661 Götz S, García-Gómez JM, Terol J *et al.* (2008) High-throughput functional annotation and data  
662 mining with the Blast2GO suite. *Nucleic Acids Research*, **36**, 3420–35.
- 663 Grossman SR, Shylakhter I, Karlsson EK *et al.* (2010) A composite of multiple signals  
664 distinguishes causal variants in regions of positive selection. *Science*, **327**, 883–6.
- 665 Gutenkunst RN, Hernandez RD, Williamson SH, Bustamante CD (2009) Inferring the joint  
666 demographic history of multiple populations from multidimensional SNP frequency data.  
667 *PLoS Genetics*, **5**, e1000695.
- 668 Harris SE, Munshi-South J, Oberfell C, O’Neill R (2013) Signatures of Rapid Evolution in  
669 Urban and Rural Transcriptomes of White-Footed Mice (*Peromyscus leucopus*) in the New  
670 York Metropolitan Area. *PLoS ONE*, **8**, e74938.
- 671 Harris SE, O’Neill RJ, Munshi-South J (2015) Transcriptome resources for the white-footed  
672 mouse (*Peromyscus leucopus*): new genomic tools for investigating ecologically divergent  
673 urban and rural populations. *Molecular Ecology Resources*, **15**, 382–394.
- 674 Harris SE, Xue AT, Alvarado-Serrano D *et al.* (2016) Urbanization shapes the demographic  
675 history of a native rodent (the white-footed mouse, *Peromyscus leucopus*) in New York  
676 City. *Biology Letters*, **12**, 20150983-.
- 677 Henry P, Russello MA (2013) Adaptive divergence along environmental gradients in a climate-  
678 change-sensitive mammal. *Ecology and Evolution*, **3**, 3906–3917.
- 679 Hermisson J (2009) Who believes in whole-genome scans for selection? *Heredity*, **103**, 283–284.
- 680 Hermisson J, Pennings PS (2005) Soft sweeps: Molecular population genetics of adaptation from

- 681 standing genetic variation. *Genetics*, **169**, 2335–2352.
- 682 Hoban S, Kelley JL, Lotterhos KE *et al.* (2016) Finding the Genomic Basis of Local Adaptation:  
683 Pitfalls, Practical Solutions, and Future Directions. *The American Naturalist*, **188**, 379–397.
- 684 Hoekstra HE, Hirschmann RJ, Bunday RA, Insel PA, Crossland JP (2006) A Single Amino Acid  
685 Mutation Contributes to Adaptive Beach Mouse Color Pattern. *Science*, **313**, 101–104.
- 686 Hof AEV, Campagne P, Rigden DJ *et al.* (2016) The industrial melanism mutation in British  
687 peppered moths is a transposable element. *Nature*, **534**, 102–105.
- 688 Hohenlohe PA, Bassham S, Etter PD *et al.* (2010a) Population genomics of parallel adaptation in  
689 threespine stickleback using sequenced RAD tags. *PLoS Genetics*, **6**, e1000862.
- 690 Hohenlohe PA, Phillips PC, Cresko WA (2010b) Using Population Genomics to Detect Selection  
691 in Natural Populations: Key Concepts and Methodological Considerations. *International*  
692 *Journal of Plant Sciences*, **171**, 1059–1071.
- 693 Hyndman D, Bauman DR, Heredia V V., Penning TM (2003) The aldo-keto reductase  
694 superfamily homepage. *Chemico-Biological Interactions*, **143–144**, 621–631.
- 695 Joost S, Bonin A, Bruford MW *et al.* (2007) A spatial analysis method (SAM) to detect  
696 candidate loci for selection: towards a landscape genomics approach to adaptation.  
697 *Molecular Ecology*, **16**, 3955–69.
- 698 Kanehisa M, Goto S, Sato Y *et al.* (2014) Data, information, knowledge and principle: Back to  
699 metabolism in KEGG. *Nucleic Acids Research*, **42**, 199–205.
- 700 Kim Y, Stephan W (2002) Detecting a local signature of genetic hitchhiking along a  
701 recombining chromosome. *Genetics*, **160**, 765–777.
- 702 De Kort H, Vandepitte K, Bruun HH *et al.* (2014) Landscape genomics and a common garden  
703 trial reveal adaptive differentiation to temperature across Europe in the tree species *Alnus*

- 704 *glutinosa*. *Molecular Ecology*, 4709–4721.
- 705 Lankau RA, Strauss SY (2011) Newly rare or newly common: evolutionary feedbacks through  
706 changes in population density and relative species abundance, and their management  
707 implications. *Evolutionary Applications*, **4**, 338–353.
- 708 Li J, Li H, Jakobsson M *et al.* (2012) Joint analysis of demography and selection in population  
709 genetics: where do we stand and where could we go? *Molecular Ecology*, **28**, 28–44.
- 710 Limborg MT, Helyar SJ, De Bruyn M *et al.* (2012) Environmental selection on transcriptome-  
711 derived SNPs in a high gene flow marine fish, the Atlantic herring (*Clupea harengus*).  
712 *Molecular ecology*, **21**, 3686–703.
- 713 Linnen CR, Kingsley EP, Jensen JD, Hoekstra HE (2009) On the origin and spread of an  
714 adaptive allele in deer mice. *Science*, **325**, 1095–8.
- 715 Lotterhos KE, Whitlock MC (2014) Evaluation of demographic history and neutral  
716 parameterization on the performance of F<sub>ST</sub> outlier tests. *Molecular Ecology*, **23**, 2178–  
717 2192.
- 718 Lotterhos KE, Whitlock MC (2015) The relative power of genome scans to detect local  
719 adaptation depends on sampling design and statistical method. *Molecular Ecology*, **24**,  
720 1031–1046.
- 721 Lourenco A, Alvarez D, Wang IJ, Velo-Anton G (2017) Trapped within the city: integrating  
722 demography, time since isolation and population-specific traits to assess the genetic effects  
723 of urbanization. *Molecular Ecology*, **26**, 1498–1514.
- 724 MacManes MD, Eisen MB (2014) Characterization of the transcriptome, nucleotide sequence  
725 polymorphism, and natural selection in the desert adapted mouse *Peromyscus eremicus*.  
726 *PeerJ*, **2**, e642.



- 727 McKinney ML (2002) Urbanization, biodiversity, and conservation. *Bioscience*, **52**, 883–890.
- 728 McManus KF, Kelley JL, Song S *et al.* (2014) Inference of Gorilla Demographic and Selective  
729 History from Whole-Genome Sequence Data. *Molecular Biology and Evolution*, **32**, 600–  
730 612.
- 731 Merilä J, Hendry AP (2014) Climate change, adaptation, and phenotypic plasticity: the problem  
732 and the evidence. *Evolutionary Applications*, **7**, 1–14.
- 733 Mueller JC, Partecke J, Hatchwell BJ, Gaston KJ, Evans KL (2013) Candidate gene  
734 polymorphisms for behavioural adaptations during urbanization in blackbirds. *Molecular*  
735 *Ecology*, **22**, 3629–3637.
- 736 Mullen LM, Hoekstra HE (2008) Natural selection along an environmental gradient: a classic  
737 cline in mouse pigmentation. *Evolution*, **62**, 1555–70.
- 738 Munshi-South J (2012) Urban landscape genetics: canopy cover predicts gene flow between  
739 white-footed mouse (*Peromyscus leucopus*) populations in New York City. *Molecular*  
740 *Ecology*, **21**, 1360–1378.
- 741 Munshi-South J, Kharchenko K (2010) Rapid, pervasive genetic differentiation of urban white-  
742 footed mouse (*Peromyscus leucopus*) populations in New York City. *Molecular Ecology*,  
743 **19**, 4242–4254.
- 744 Munshi-South J, Nagy C (2014) Urban park characteristics, genetic variation, and historical  
745 demography of white-footed mouse ( *Peromyscus leucopus* ) populations in New York City.  
746 *PeerJ*, **2**, e310.
- 747 Munshi-South J, Richardson JL (2017) *Peromyscus* transcriptomics: Understanding adaptation  
748 and gene expression plasticity within and between species of deer mice. *Seminars in Cell &*  
749 *Developmental Biology*, **61**, 131–139.

- 750 Munshi-South J, Zolnik CP, Harris SE (2016) Population genomics of the Anthropocene: urbani  
751 zation is negatively associated with genome-wide variation in white-footed mouse  
752 populations. *Evolutionary Applications*, doi:10.1111/eva.12357.
- 753 Natarajan C, Inoguchi N, Weber RE *et al.* (2013) Epistasis Among Adaptive Mutations in Deer  
754 Mouse Hemoglobin. *Science*, **340**, 1324–1327.
- 755 Nielsen R (2005) Molecular signatures of natural selection. *Annual Review of Genetics*, **39**, 197–  
756 218.
- 757 Nielsen R, Williamson S, Kim Y *et al.* (2005) Genomic scans for selective sweeps using SNP  
758 data. *Genome research*, **15**, 1566–75.
- 759 Noël S, Lapointe F (2010) Urban conservation genetics : Study of a terrestrial salamander in the  
760 city. , **143**, 2823–2831.
- 761 Ogata H, Goto S, Sato K *et al.* (1999) KEGG: Kyoto encyclopedia of genes and genomes.  
762 *Nucleic Acids Research*, **27**, 29–34.
- 763 Oleksyk TK, Smith MW, O’Brien SJ (2010) Genome-wide scans for footprints of natural  
764 selection. *Philosophical transactions of the Royal Society of London. Series B, Biological*  
765 *sciences*, **365**, 185–205.
- 766 Oliveira DCSG, Raychoudhury R, Lavrov D V, Werren JH (2008) Rapidly evolving  
767 mitochondrial genome and directional selection in mitochondrial genes in the parasitic wasp  
768 *Nasonia* (Hymenoptera: Pteromalidae). *Molecular Biology and Evolution*, **25**, 2167–2180.
- 769 Orr HA (2005) The genetic theory of adaptation: a brief history. *Nature Reviews Genetics*, **6**,  
770 119–27.
- 771 Partecke J, Schwabl I, Gwinner E (2006) Stress and the city: Urbanization and its effects on the  
772 stress physiology in European Blackbirds. *Ecology*, **87**, 1945–1952.

- 773 Patterson N, Price AL, Reich D (2006) Population structure and eigenanalysis. *PLoS Genetics*, **2**,  
774 e190.
- 775 Pavlidis P, Jensen JD, Stephan W (2010) Searching for Footprints of Positive Selection in  
776 Whole-genome SNP Data from Non-equilibrium Populations. *Genetics*.
- 777 Pavlidis P, Živkovic D, Stamatakis A, Alachiotis N (2013) SweeD: likelihood-based detection of  
778 selective sweeps in thousands of genomes. *Molecular Biology and Evolution*, **30**, 2224–34.
- 779 Pérez-Figueroa A, García-Pereira MJ, Saura M, Rolán-Alvarez E, Caballero A (2010)  
780 Comparing three different methods to detect selective loci using dominant markers. *Journal*  
781 *of Evolutionary Biology*, **23**, 2267–2276.
- 782 Pergams ORW, Lacy RC (2008) Rapid morphological and genetic change in Chicago-area  
783 *Peromyscus*. *Molecular Ecology*, **17**, 450–63.
- 784 Reid NM, Proestou DA, Clark BW *et al.* (2016) The genomic landscape of rapid repeated  
785 evolutionary adaptation to toxic pollution in wild fish. *Science*, **354**, 1305–1308.
- 786 Reimand J, Arak T, Adler P *et al.* (2016) g:Profiler—a web server for functional interpretation of  
787 gene lists (2016 update). *Nucleic Acids Research*, **44**, W83–W89.
- 788 Rellstab C, Fischer MC, Zoller S *et al.* (2017) Local adaptation (mostly) remains local:  
789 reassessing environmental associations of climate-related candidate SNPs in *Arabidopsis*  
790 *halleri*. *Heredity*, **118**, 193–201.
- 791 Rellstab C, Gugerli F, Eckert AJ, Hancock AM, Holderegger R (2015) A practical guide to  
792 environmental association analysis in landscape genomics. *Molecular Ecology*, **24**, 4348–  
793 4370.
- 794 Rockman M (2012) The QTN program and the alleles that matter for evolution: all that’s gold  
795 does not glitter. *Evolution*, **66**, 1–17.

- 796 Rogic A, Tessier N, Legendre P, Lapointe F-J, Millien V (2013) Genetic structure of the white-  
797 footed mouse in the context of the emergence of Lyme disease in southern Québec. *Ecology*  
798 *and Evolution*, **3**, 2075–88.
- 799 Rytwinski T, Fahrig L (2007) Effect of road density on abundance of white-footed mice.  
800 *Landscape Ecology*, **22**, 1501–1512.
- 801 Savolainen O, Lascoux M, Merilä J (2013) Ecological genomics of local adaptation. *Nature*  
802 *Reviews Genetics*, **14**, 807–20.
- 803 Serieys LEK, Lea A, Pollinger JP, Riley SPD, Wayne RK (2015) Disease and freeways drive  
804 genetic change in urban bobcat populations. *Evolutionary Applications*, **8**, 75–92.
- 805 Settachan D (2001) Mechanistic and molecular studies into the effects of 2,3,7,8-  
806 tetrachlorodibenzo-p-dioxin and similar compounds in the deer mouse, *Peromyscus*  
807 *maniculatus*. Texas Tech University.
- 808 Shochat E, Warren PS, Faeth SH, McIntyre NE, Hope D (2006) From patterns to emerging  
809 processes in mechanistic urban ecology. *Trends in Ecology and Evolution*, **21**, 186–91.
- 810 Sih A, Ferrari MCO, Harris DJ (2011) Evolution and behavioural responses to human-induced  
811 rapid environmental change. *Evolutionary Applications*, **4**, 367–387.
- 812 Sork VL, Aitken SN, Dyer RJ *et al.* (2013) Putting the landscape into the genomics of trees:  
813 Approaches for understanding local adaptation and population responses to changing  
814 climate. *Tree Genetics and Genomes*, **9**, 901–911.
- 815 Stapley J, Reger J, Feulner PGD *et al.* (2010) Adaptation Genomics: the next generation. *Trends*  
816 *in Ecology & Evolution*, **25**, 705–712.
- 817 Stinchcombe JR, Hoekstra HE (2008) Combining population genomics and quantitative genetics:  
818 finding the genes underlying ecologically important traits. *Heredity*, **100**, 158–70.

- 819 Storz JF, Runck AM, Moriyama H, Weber RE, Fago A (2010) Genetic differences in  
820 hemoglobin function between highland and lowland deer mice. *The Journal of*  
821 *Experimental Biology*, **213**, 2565–74.
- 822 Storz JF, Runck AM, Sabatino SJ *et al.* (2009) Evolutionary and functional insights into the  
823 mechanism underlying high-altitude adaptation of deer mouse hemoglobin. *Proceedings of*  
824 *the National Academy of Sciences of the United States of America*, **106**, 14450–5.
- 825 Storz J, Sabatino S, Hoffmann F (2007) The molecular basis of high-altitude adaptation in deer  
826 mice. *PLoS Genetics*, **3**.
- 827 Supek F, Bosnjak M, Skunca N, Smuc T (2011) Revigo summarizes and visualizes long lists of  
828 gene ontology terms. *PLoS ONE*, **6**.
- 829 Tajima F (1983) Evolutionary relationship of DNA sequences in finite populations. *Genetics*,  
830 **105**, 437–460.
- 831 Tajima F (1989) Statistical method for testing the neutral mutation hypothesis by DNA  
832 polymorphism. *Genetics*, **123**, 585–95.
- 833 Thompson KA, Renaudin M, Johnson MTJ (2016) Urbanization drives the evolution of parallel  
834 clines in plant populations. *Proceedings of the Royal Society B: Biological Sciences*, **283**,  
835 20162180.
- 836 Tiffin P, Ross-Ibarra J (2014) Advances and limits of using population genetics to understand  
837 local adaptation. *Trends in Ecology & Evolution*, **29**, 673–680.
- 838 Tomassini A, Colangelo P, Agnelli P *et al.* (2014) Cranial size has increased over 133 years in a  
839 common bat, *Pipistrellus kuhlii*: a response to changing climate or urbanization? *Journal*  
840 *Biogeography*, **41**, 944–953.
- 841 Turner TL, Bourne EC, Von Wettberg EJ, Hu TT, Nuzhdin S V (2010) Population resequencing

- 842 reveals local adaptation of *Arabidopsis lyrata* to serpentine soils. *Nature Genetics*, **42**, 260–  
843 3.
- 844 Ungar PS (2010) *Mammal Teeth: Origin, Evolution, and Diversity*. Johns Hopkins University  
845 Press, Baltimore, MD.
- 846 De Villemereuil P, Frichot É, Bazin É, François O, Gaggiotti OE (2014) Genome scan methods  
847 against more complex models: When and how much should we trust them? *Molecular*  
848 *Ecology*, **23**, 2006–2019.
- 849 Vitti JJ, Grossman SR, Sabeti PC (2013) Detecting natural selection in genomic data. *Annual*  
850 *review of genetics*, **47**, 97–120.
- 851 Wandeler P, Funk SM, Largiadèr CR, Gloor S, Breitenmoser U (2003) The city-fox  
852 phenomenon: genetic consequences of a recent colonization of urban habitat. *Molecular*  
853 *Ecology*, **12**, 647–56.
- 854 Wang W, Wu Z, Dai Z *et al.* (2013) Glycine metabolism in animals and humans: Implications  
855 for nutrition and health. *Amino Acids*, **45**, 463–477.
- 856 Wang M, Yu Y, Haberer G *et al.* (2014) The genome sequence of African rice (*Oryza*  
857 *glaberrima*) and evidence for independent domestication. *Nature Genetics*, 982–988.
- 858 Weber JN, Peterson BK, Hoekstra HE (2013) Discrete genetic modules are responsible for  
859 complex burrow evolution in *Peromyscus* mice. *Nature*, **493**, 402–405.
- 860 Whitehead A, Triant D, Champlin D, Nacci D (2010) Comparative transcriptomics implicates  
861 mechanisms of evolved pollution tolerance in a killifish population. *Molecular Ecology*, **19**,  
862 5186–5203.
- 863 Wirgin I, Roy NK, Loftus M *et al.* (2011) Mechanistic basis of resistance to PCBs in Atlantic  
864 tomcod from the Hudson River. *Science (New York, N.Y.)*, **331**, 1322–5.

- 865 De Wit P, Palumbi SR (2013) Transcriptome-wide polymorphisms of red abalone (*Haliotis*  
866 *rufescens*) reveal patterns of gene flow and local adaptation. *Molecular Ecology*, **22**, 2884–  
867 97.
- 868 Wolff JO, Dueser RD, Berry K (1985) Food Habits of Sympatric *Peromyscus leucopus* and  
869 *Peromyscus maniculatus*. *Journal of Mammalogy*, **66**, 795–798.
- 870 Wright S (1951) The genetical structure of populations. *Annals of Eugenics*, 323–354.
- 871 Ye K, Gao F, Wang D, Bar-Yosef O, Keinan A (2017) Dietary adaptation of FADS genes in  
872 Europe varied across time and geography. *Nature Ecology & Evolution*, **1**, 167.
- 873 Yeh PJ (2004) Rapid evolution of a sexually selected trait following population establishment in  
874 a novel habitat. *Evolution*, **58**, 166–174.
- 875 Yu A, Munshi-south J, Sargis EJ *et al.* (2017) Morphological Differentiation in White-Footed  
876 Mouse ( Mammalia : Rodentia : Cricetidae : *Peromyscus leucopus* ) Populations from the  
877 New York City Metropolitan Area. *Bulletin of the Peabody Museum of Natural History*, **58**,  
878 3–16.
- 879 Zhou L, Bawa R, Holliday JA (2014) Exome resequencing reveals signatures of demographic  
880 and adaptive processes across the genome and range of black cottonwood (*Populus*  
881 *trichocarpa*). *Molecular Ecology*, **23**, 2486–2499.

882

### 883 **Data Accessibility**

884 -VCF file of SNP genotypes used for demographic inference: Dryad doi:10.5061/dryad.d48f9

885 -raw sequencing files for transcriptome data: GenBank Sequence Read Archive (SRA Accession  
886 no. [SRP020005](https://www.ncbi.nlm.nih.gov/sra/SRP020005))

887 -Transcriptome contigs: Dryad doi:[10.5061/dryad.6hc0f](https://www.dryad.org/doi/10.5061/dryad.6hc0f)

888



889 **FIGURE LEGENDS**

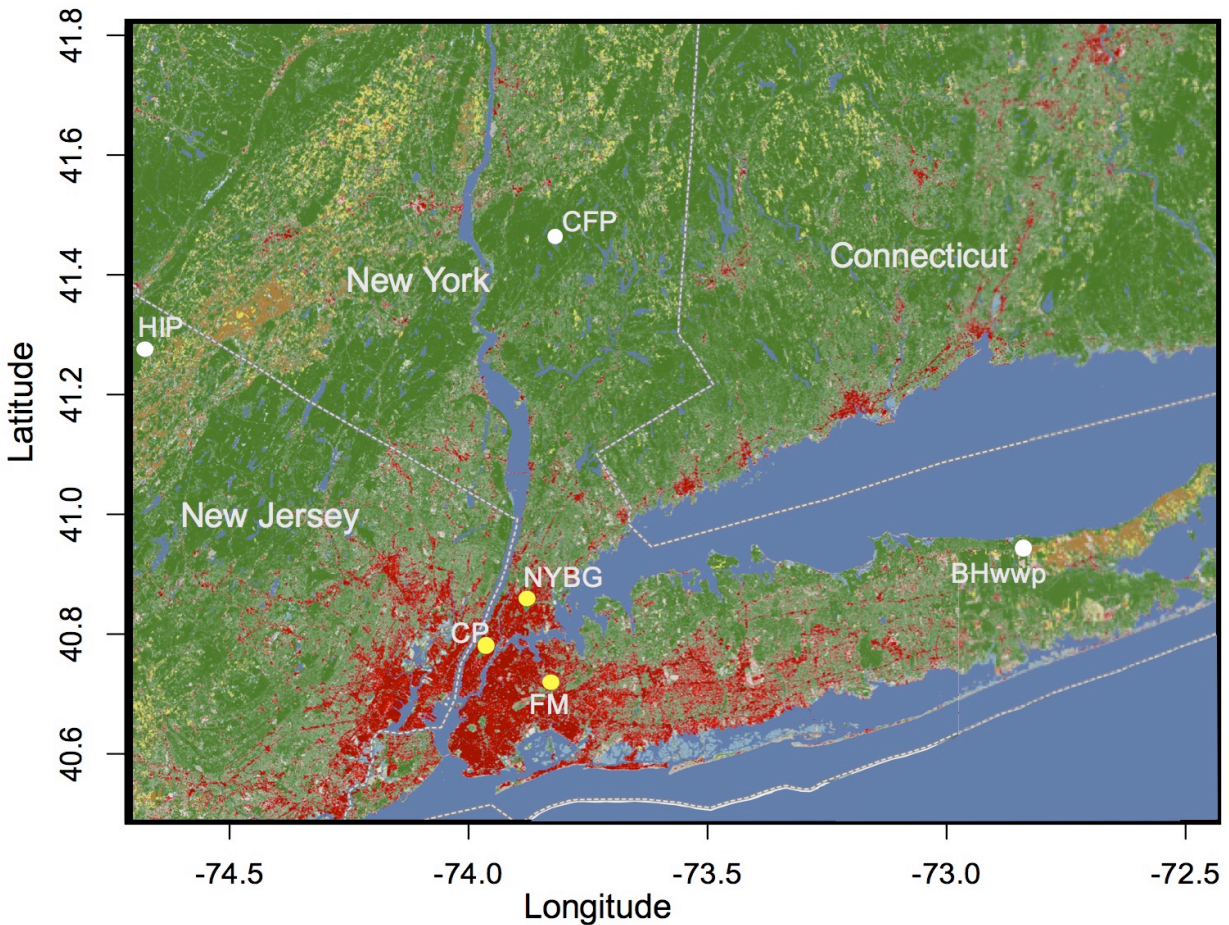

890

891

892 **Figure 1.** Map of sample localities in the NYC metropolitan area. Sites in yellow are urban  
893 parks within New York City, CP = Central Park; FM = Flushing Meadows—Willow Lake;  
894 NYBG = New York Botanical Gardens. Sites in white are rural parks, BHwwp = Brookhaven  
895 and Wildwood State Park; CFP = Clarence Fahnestock State Park; HIP = High Point State Park.  
896 The map includes data from the National Land Cover Database. All non-green colors are shaded  
897 according to land use. Yellows and browns equal cultivated land and reds represent developed  
898 areas (Darker red = increased development). Green colors are shaded according to canopy cover  
899 (Darker green = increased canopy cover) and come from the 2011 National Land Cover Canopy  
900 database. Full legends for the colors are shown in Figure S1.

901

902

903



904

905

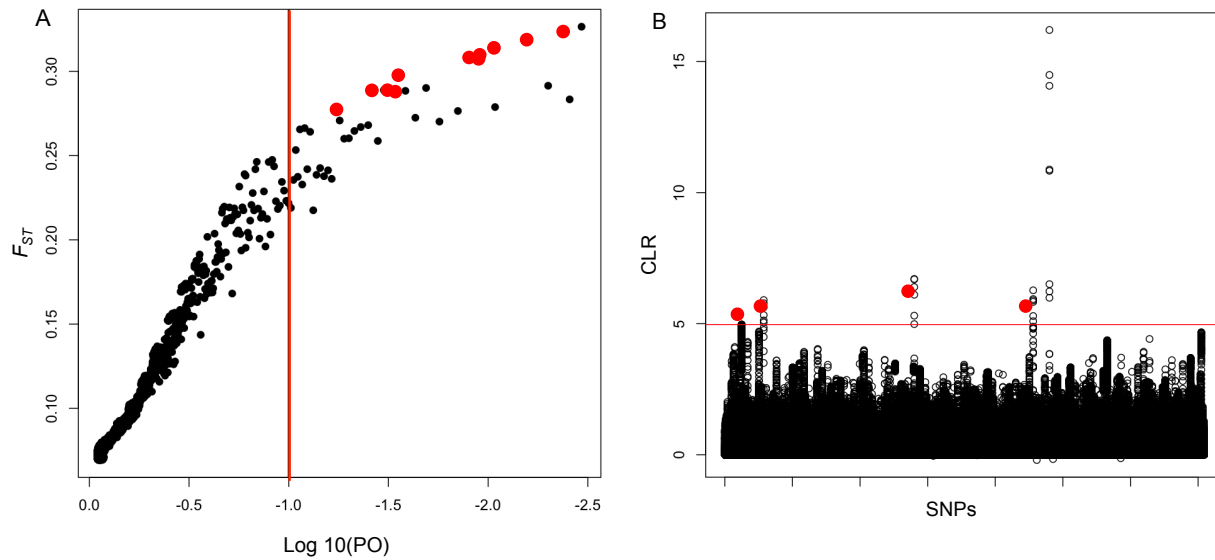

906

907

908 **Figure 2.** (a) BayeScan 2.1 plot of 154,770 SNPs genome scan analysis between urban and rural  
909 populations, including 48 individual white-footed mice from six NYC sampling sites.  $F_{ST}$  is on  
910 the vertical axis plotted against the  $\log_{10}$  of the posterior odds (PO). The vertical red line  
911 indicates the cutoff ( $q$ -value = 0.1) used for identifying outlier SNPs. The markers on the right  
912 side of the vertical line show all outlier SNP candidates and the red circles represent the final  
913 accepted outlier SNPs from Table 2. (b) SweeD results with each of the 154,770 SNPs plotted  
914 from all 48 individuals. The Composite Likelihood Ratio (CLR) is plotted along the vertical  
915 axis and each unfilled point represents an individual SNP. The x-axis has SNPs ordered by  
916 contig, but not by genomic position. The horizontal red line indicates the cutoff used for  
917 identifying outlier SNPs at  $P \leq 0.0001$ . The red circles represent the final accepted outlier SNPs  
918 from Table 2.

919

920

921

922

923

924

925

926

927

928

929

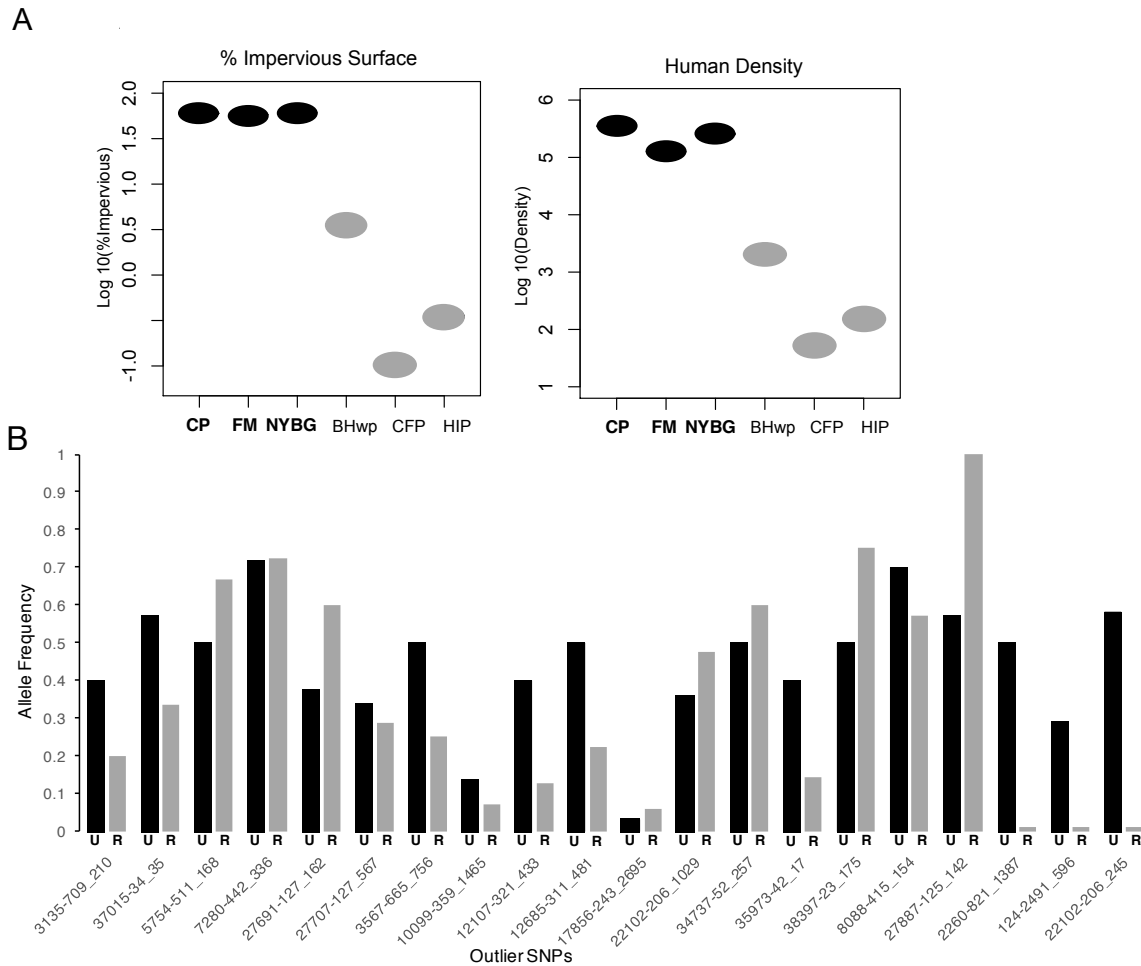

930

931

**Figure 3.** (a) Plot of urbanization metrics for all 6 sampling sites from NYC used in this study. Urban sampling sites are highlighted in bold on the horizontal axis and colored black. Rural sites are colored gray. The log10 value of % Impervious Surface and Human Density are plotted along the vertical axis and the oval represents the value for each sampling site. (b) Allele frequencies for candidate loci identified from both genome scans and GEA tests grouped by urban (U, black) or rural (R, gray) classification. The frequency of the outlier SNP within each type of population is plotted on the vertical axis. Each candidate loci is labeled with the contig and outlier SNP on the horizontal axis; see Table 2 for associated gene names.

940

941

942 **TABLES**

943 **Table 1.** Summary population genomic statistics (mean  $\pm$  standard error) for three urban and  
944 three rural populations of white-footed mice (*Peromyscus leucopus*) examined in this study.

| Population   | Nucleotide diversity ( $\pi$ ) | Tajima's <i>D</i> | 945 |
|--------------|--------------------------------|-------------------|-----|
| <i>Urban</i> |                                |                   | 946 |
| CP           | 0.131 $\pm$ 0.001              | 0.318 $\pm$ 0.005 |     |
| FM           | 0.112 $\pm$ 0.001              | 0.301 $\pm$ 0.006 | 947 |
| NYBG         | 0.092 $\pm$ 0.001              | 0.280 $\pm$ 0.006 | 948 |
| <i>Rural</i> |                                |                   |     |
| BHwwp        | 0.198 $\pm$ 0.001              | 0.350 $\pm$ 0.004 | 949 |
| CFP          | 0.211 $\pm$ 0.001              | 0.336 $\pm$ 0.004 |     |
| HIP          | 0.263 $\pm$ 0.001              | 0.349 $\pm$ 0.004 | 950 |

951

952

953

954

955

956

957 **Table 2.** Outlier loci ( $N = 19$ ) identified in at least one test for selection (BayeScan, BayPass, or  
 958 SweeD) and one GEA test (LFMM or BayPass\_GEA). SNP shows the position in contig  
 959 containing the outlier loci. Tests show which tests identified the SNP as an outlier: BPG =  
 960 BayPass\_GEA; BPD = BayPass\_Diversifying; BS = BayeScan; SW = SweeD; LFMM = LFMM.

| Contig    | SNP          | Ensemble Gene ID   | Gene                                                | Tests             |
|-----------|--------------|--------------------|-----------------------------------------------------|-------------------|
| 27887-125 | 142          | ENSMUSG00000029440 | proteasome 26S subunit, non-ATPase, 9               | BPG, BS           |
| 3135-709  | 210          | ENSMUSG00000002320 | transmembrane 9 superfamily member 1                | BPG, BS           |
| 37015-34  | 35           | ENSMUSG00000037287 | tubulin folding cofactor E-like                     | BS, BPD           |
| 5754-511  | 168          | ENSMUSG00000041161 | OTU domain containing 3                             | BPG, BS           |
| 7280-442  | 336          | ENSMUSG00000021287 | X-ray repair complementing defective repair in CHC3 | BPD, LFMM         |
| 2260-821  | 1387         | ENSMUSG00000024045 | A kinase (PRKA) anchor protein 8                    | BPG, BS           |
| 27691-127 | 162          | NA                 | NA                                                  | BPG, BS           |
| 27707-127 | 567          | ENSMUSG00000106907 | autophagy related 2A                                | BPG, BS, BPD      |
| 3567-665  | 756          | ENSMUSG00000001700 | GRAM domain containing 3                            | BPG, BS, BPD      |
| 10099-359 | 1465         | ENSMUSG00000024066 | xanthine dehydrogenase                              | BPG, SW           |
| 12107-321 | 433          | NA                 | NA                                                  | BPG,BS            |
| 124-2491  | 596          | ENSMUSG00000064358 | cytochrome c oxidase III                            | BPG, SW           |
| 12685-311 | 481          | ENSMUSG00000035637 | glyoxylate reductase/hydroxypyruvate reductase      | BPG, BPD          |
| 17856-243 | 2695         | ENSMUSG00000021091 | serine peptidase inhibitor, clade A, member 3N      | LFMM, SW          |
| 22102-206 | 245,<br>1029 | ENSMUSG00000045868 | GTPase, very large interferon inducible 1           | BPG, BPD,<br>LFMM |
| 34737-52  | 125,<br>257  | NA                 | NA                                                  | BPG, BPD          |
| 35973-42  | 17           | ENSMUSG00000001173 | oculocerebrorenal syndrome of Lowe                  | BPG, BS           |
| 38397-23  | 175          | NA                 | NA                                                  | BPG, BS           |
| 8088-415  | 154          | ENSMUSG00000002379 | NADH dehydrogenase 1 alpha subcomplex 11            | BPG, BPD,<br>LFMM |

961

962 **Table 3.** Overrepresented gene ontology (GO) terms from g:Profiler (q-value < 0.05) for the 19  
 963 outlier loci from tests for both selection and GEA. Associated genes shows which ensemble gene  
 964 homologs from Table 2 are associated with each overrepresented term.

| Description                                       | Annotation ID | P-value | Associated Genes                                                                                   |
|---------------------------------------------------|---------------|---------|----------------------------------------------------------------------------------------------------|
| Negative regulation of protein kinase B signaling | GO:0051898    | 0.05    | ENSMUSG00000024066, ENSMUSG00000041161                                                             |
| Cytochrome c oxidase, mitochondrial               | CORUM:538     | 0.05    | ENSMUSG00000064358                                                                                 |
| Ocr1-Cdc42 complex                                | CORUM:975     | 0.00914 | ENSMUSG00000001173                                                                                 |
| Glyoxylate and dicarboxylate metabolism           | KEGG:00630    | 0.0355  | ENSMUSG00000035637                                                                                 |
| Homologous recombination                          | KEGG:03440    | 0.0512  | ENSMUSG00000021287                                                                                 |
| Pyruvate metabolism                               | KEGG:00620    | 0.0464  | ENSMUSG00000035637                                                                                 |
| Oxidative phosphorylation                         | KEGG:00190    | 0.00791 | ENSMUSG00000002379, ENSMUSG00000064358                                                             |
| Alzheimer's disease                               | KEGG:05010    | 0.0133  | ENSMUSG00000002379, ENSMUSG00000064358                                                             |
| Huntington's disease                              | KEGG:05016    | 0.0158  | ENSMUSG00000002379, ENSMUSG00000064358                                                             |
| Non-alcoholic fatty liver disease (NAFLD)         | KEGG:04932    | 0.0101  | ENSMUSG00000002379, ENSMUSG00000064358                                                             |
| Glycine, serine and threonine metabolism          | KEGG:00260    | 0.05    | ENSMUSG00000035637                                                                                 |
| Metabolic pathways                                | KEGG:01100    | 0.0029  | ENSMUSG00000001173, ENSMUSG00000002379, ENSMUSG00000024066, ENSMUSG00000035637, ENSMUSG00000064358 |
| Parkinson's disease                               | KEGG:05012    | 0.00899 | ENSMUSG00000002379, ENSMUSG00000064358                                                             |
| Autophagy - other                                 | KEGG:04136    | 0.0404  | ENSMUSG00000106907                                                                                 |
| Caffeine metabolism                               | KEGG:00232    | 0.00742 | ENSMUSG00000024066                                                                                 |

965

966

967

968

969 **SUPPORTING INFORMATION**

970 **Table S1.** Average pairwise  $F_{ST}$  among six *P. leucopus* populations based on transcriptome-  
971 derived SNPs.

972 **Table S2.** Excel file containing the full list of outlier contigs (N = 381), the outlier SNP position,  
973 and test(s) that identified the outlier SNP. Remaining columns list the homologous Ensemble  
974 *Mus musculus* gene ID and name.

975 **Table S3.** Excel file containing results from g:Profiler for overrepresented GO terms from the  
976 full list of outlier contigs in Table S2. The table also includes the homologous *Mus musculus*  
977 genes that are associated with each GO term.

978 **Table S4.** Excel file containing Revigo results. Enriched GO terms from g:Profiler are sorted  
979 into largest parent terms and listed based on the frequency of occurrence.

980 **Table S5.** Environmental variable values for each individual mouse. Impervious = mean %  
981 impervious surface in 2 km buffer. Density = human population per 2 km buffer. Urban or Rural  
982 = classification as urban or rural site.
